# Supplementary material for: Active and Passive Use of Green Space, Health, and Well-Being amongst University Students
Source: PubMed Central journal article supplement (PMC6388138; doi:10.3390/ijerph16030424), 2019-02-01
Supplement: ijerph-16-00424-s001.pdf [file ijerph-16-00424-s001.pdf]

**Table S1.** Characteristics of the Study Population (n = 207).

| <b>Participant Characteristics</b>                                                                   |       |
|------------------------------------------------------------------------------------------------------|-------|
| Southeast/Gulf South Region                                                                          | 71.4% |
| Northeast Region                                                                                     | 17.4% |
| Midwest/ Western Region                                                                              | 7.8%  |
| Non-Hispanic White                                                                                   | 85.5% |
| Black                                                                                                | 4.4%  |
| Latino/Hispanic                                                                                      | 3.4%  |
| Asian American                                                                                       | 2.9%  |
| Native American                                                                                      | 1.9%  |
| Female Gender                                                                                        | 69.6% |
| Freshman                                                                                             | 42.5% |
| Sophomore                                                                                            | 31.9% |
| Junior                                                                                               | 15.9% |
| Senior                                                                                               | 9.7%  |
| “Very busy” with schoolwork                                                                          | 55.6% |
| “Very busy” with extracurricular activities                                                          | 37.3% |
| Never feel unsafe on campus                                                                          | 84.0% |
| <b>Green Space Use and Attitudes about/ Experiences with Nature</b>                                  |       |
| High <i>Active</i> Use of Green Space                                                                | 33.3% |
| High <i>Passive</i> Use of Green Space                                                               | 33.8% |
| High <i>Overall</i> Green User Score                                                                 | 51.7% |
| Daily, <i>structured</i> interactions with green space as a child                                    | 53.4% |
| Daily, <i>unstructured</i> interactions with green space as a child                                  | 42.1% |
| <i>Being connected with nature is a necessity for human beings</i>                                   |       |
| Strongly Agree                                                                                       | 25.0% |
| Agree                                                                                                | 47.5% |
| Neutral                                                                                              | 21.4% |
| Disagree                                                                                             | 4.1%  |
| Strongly Disagree                                                                                    | 2.0%  |
| <i>I Associate Green Space with...</i>                                                               |       |
| Adventure                                                                                            | 77.3% |
| Feeling energized                                                                                    | 66.2% |
| Boredom                                                                                              | 14.5% |
| Feeling uncomfortable                                                                                | 7.7%  |
| I visit green space to reduce stress                                                                 | 54.2% |
| I wish I visited green space more often                                                              | 80.6% |
| <i>Primary barriers to not using green space more frequently?</i>                                    |       |
| Not enough time                                                                                      | 71.0% |
| Difficulty accessing off-campus green space                                                          | 14.5% |
| Not aware of off-campus green space opportunities                                                    | 13.5% |
| Not aware of on-campus green space opportunities                                                     | 11.1% |
| Health Risks (i.e., allergies/sun exposure)                                                          | 5.8%  |
| Other (ex: hard to use laptop outside/get wireless connection)                                       | 7.2%  |
| <b>Measures of Health and Well-Being</b>                                                             |       |
| <i>When all things in your life are considered, how did you feel (most days) in the last 7 days?</i> |       |

---

|                                                                                                  |           |
|--------------------------------------------------------------------------------------------------|-----------|
| Very Happy                                                                                       | 17.0%     |
| Content                                                                                          | 47.0%     |
| OK                                                                                               | 26.7%     |
| Not very happy                                                                                   | 8.1%      |
| Miserable                                                                                        | 1.5%      |
| <i>Overall, how would you rank the quality of your life?</i>                                     |           |
| Very Satisfied                                                                                   | 29.8%     |
| Mostly Satisfied                                                                                 | 28.8%     |
| Satisfied                                                                                        | 35.4%     |
| Mostly dissatisfied                                                                              | 5.6%      |
| Dissatisfied                                                                                     | 0.5%      |
| <i>Cohen's Perceived Stress Scale (10-item)</i>                                                  |           |
| Median[IQR]                                                                                      | 15[11,20] |
| Low Stress ( $\leq 12$ )                                                                         | 34.8%     |
| Medium or High Stress ( $> 12$ )                                                                 | 65.2%     |
| <i>Would you say that in general your health is...</i>                                           |           |
| Excellent                                                                                        | 22.2%     |
| Very good                                                                                        | 34.3%     |
| Good                                                                                             | 35.4%     |
| Fair                                                                                             | 6.1%      |
| Poor                                                                                             | 2.0%      |
| <i>Health is always the most important consideration when I<br/>arrange my daily activities:</i> |           |
| Strongly Agree                                                                                   | 15.8%     |
| Agree                                                                                            | 33.7%     |
| Neutral                                                                                          | 35.7%     |
| Disagree                                                                                         | 12.8%     |
| Strongly Disagree                                                                                | 2.0%      |

---
